# Supplementary material for: Installation of -SO 2 F groups onto primary amides
Source: publisher site journal article supplement (doi:10.3762/bjoc.15.186), 2019-08-09

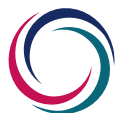

## Supporting Information

for

### Installation of -SO<sub>2</sub>F groups onto primary amides

Jing Liu, Shi-Meng Wang, Njud S. Alharbi and Hua-Li Qin

*Beilstein J. Org. Chem.* **2019**, *15*, 1907–1912. doi:10.3762/bjoc.15.186

**Checkcif file of 4e**

# checkCIF/PLATON report

Structure factors have been supplied for datablock(s) 181108c

THIS REPORT IS FOR GUIDANCE ONLY. IF USED AS PART OF A REVIEW PROCEDURE FOR PUBLICATION, IT SHOULD NOT REPLACE THE EXPERTISE OF AN EXPERIENCED CRYSTALLOGRAPHIC REFEREE.

No syntax errors found.      CIF dictionary      Interpreting this report

## Datablock: 181108c

---

|                 |                    |                                     |
|-----------------|--------------------|-------------------------------------|
| Bond precision: | C-C = 0.0059 A     | Wavelength=0.71073                  |
| Cell:           | a=5.7233(5)        | b=7.9155(7)      c=12.9158(11)      |
|                 | alpha=93.558(1)    | beta=96.119(2)      gamma=91.640(1) |
| Temperature:    | 293 K              |                                     |
|                 | Calculated         | Reported                            |
| Volume          | 580.30(9)          | 580.30(9)                           |
| Space group     | P -1               | P-1                                 |
| Hall group      | -P 1               | ?                                   |
| Moiety formula  | C7 H8 F N2 Na O7 S | ?                                   |
| Sum formula     | C7 H8 F N2 Na O7 S | C7 H8 F N2 Na O7 S                  |
| Mr              | 306.20             | 306.20                              |
| Dx,g cm-3       | 1.752              | 1.752                               |
| Z               | 2                  | 2                                   |
| Mu (mm-1)       | 0.362              | 0.362                               |
| F000            | 312.0              | 312.0                               |
| F000'           | 312.52             |                                     |
| h,k,lmax        | 6,9,15             | 6,9,15                              |
| Nref            | 2050               | 2018                                |
| Tmin,Tmax       | 0.859,0.937        | 0.848,0.938                         |
| Tmin'           | 0.844              |                                     |

Correction method= # Reported T Limits: Tmin=0.848 Tmax=0.938  
AbsCorr = MULTI-SCAN

Data completeness= 0.984      Theta(max)= 25.000

R(reflections)= 0.0782( 1488)      wR2(reflections)= 0.2058( 2018)

S = 1.106      Npar= 172

---

The following ALERTS were generated. Each ALERT has the format  
**test-name\_ALERT\_alert-type\_alert-level.**  
Click on the hyperlinks for more details of the test.

---

### Alert level A

EXPT005\_ALERT\_1\_A \_exptl\_crystal\_description is missing

Crystal habit description.

The following tests will not be performed.

CRYSR\_01

PLAT902\_ALERT\_1\_A No (Interpretable) Reflections Found in FCF .... Please Check

---

### Alert level C

PLAT242\_ALERT\_2\_C Low 'MainMol' Ueq as Compared to Neighbors of S1 Check

PLAT340\_ALERT\_3\_C Low Bond Precision on C-C Bonds ..... 0.00586 Ang.

---

### Alert level G

|                   |                                                  |      |             |
|-------------------|--------------------------------------------------|------|-------------|
| PLAT004_ALERT_5_G | Polymeric Structure Found with Maximum Dimension | 1    | Info        |
| PLAT005_ALERT_5_G | No Embedded Refinement Details Found in the CIF  |      | Please Do ! |
| PLAT007_ALERT_5_G | Number of Unrefined Donor-H Atoms .....          | 4    | Report      |
| PLAT066_ALERT_1_G | Predicted and Reported Tmin&Tmax Range Identical | ?    | Check       |
| PLAT072_ALERT_2_G | SHELXL First Parameter in WGHT Unusually Large   | 0.12 | Report      |
| PLAT093_ALERT_1_G | No s.u.'s on H-positions, Refinement Reported as |      | mixed Check |
| PLAT199_ALERT_1_G | Reported _cell_measurement_temperature ..... (K) | 293  | Check       |
| PLAT200_ALERT_1_G | Reported _diffn_ambient_temperature ..... (K)    | 293  | Check       |
| PLAT764_ALERT_4_G | Overcomplete CIF Bond List Detected (Rep/Expd) . | 1.23 | Ratio       |
| PLAT899_ALERT_4_G | SHELXL97 is Deprecated and Succeeded by SHELXL   | 2018 | Note        |

---

2 **ALERT level A** = Most likely a serious problem - resolve or explain

0 **ALERT level B** = A potentially serious problem, consider carefully

2 **ALERT level C** = Check. Ensure it is not caused by an omission or oversight

10 **ALERT level G** = General information/check it is not something unexpected

6 ALERT type 1 CIF construction/syntax error, inconsistent or missing data

2 ALERT type 2 Indicator that the structure model may be wrong or deficient

1 ALERT type 3 Indicator that the structure quality may be low

2 ALERT type 4 Improvement, methodology, query or suggestion

3 ALERT type 5 Informative message, check

---

It is advisable to attempt to resolve as many as possible of the alerts in all categories. Often the minor alerts point to easily fixed oversights, errors and omissions in your CIF or refinement strategy, so attention to these fine details can be worthwhile. In order to resolve some of the more serious problems it may be necessary to carry out additional measurements or structure refinements. However, the purpose of your study may justify the reported deviations and the more serious of these should normally be commented upon in the discussion or experimental section of a paper or in the "special\_details" fields of the CIF. checkCIF was carefully designed to identify outliers and unusual parameters, but every test has its limitations and alerts that are not important in a particular case may appear. Conversely, the absence of alerts does not guarantee there are no aspects of the results needing attention. It is up to the individual to critically assess their own results and, if necessary, seek expert advice.

### Publication of your CIF in IUCr journals

A basic structural check has been run on your CIF. These basic checks will be run on all CIFs submitted for publication in IUCr journals (*Acta Crystallographica*, *Journal of Applied Crystallography*, *Journal of Synchrotron Radiation*); however, if you intend to submit to *Acta Crystallographica Section C* or *E* or *IUCrData*, you should make sure that full publication checks are run on the final version of your CIF prior to submission.

### Publication of your CIF in other journals

Please refer to the *Notes for Authors* of the relevant journal for any special instructions relating to CIF submission.

### Validation response form

Please find below a validation response form (VRF) that can be filled in and pasted into your CIF.

```
# start Validation Reply Form
_vrf_EXPT005_181108c
;
PROBLEM: _exptl_crystal_description is missing
RESPONSE: ...
;
_vrf_PLAT902_181108c
;
PROBLEM: No (Interpretable) Reflections Found in FCF ....      Please Check
RESPONSE: ...
;
_vrf_PLAT242_181108c
;
PROBLEM: Low      'MainMol' Ueq as Compared to Neighbors of      S1 Check
RESPONSE: ...
;
_vrf_PLAT340_181108c
;
PROBLEM: Low Bond Precision on  C-C Bonds .....      0.00586 Ang.
RESPONSE: ...
;
# end Validation Reply Form
```

---

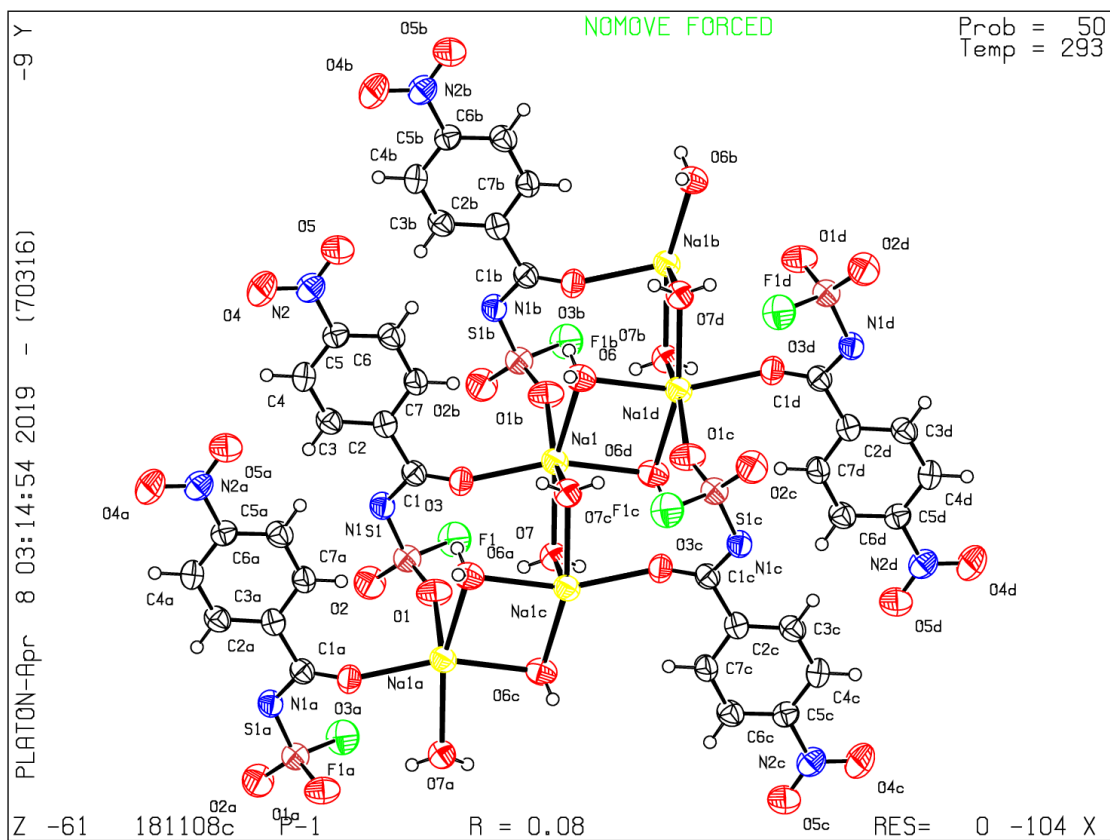

Supplement: Additional file 3 [file 1860-5397-15-186-S3.pdf]
